# Supplementary material
Source: Springer Nature journal article supplement (https://www.springermedizin.de/resource/supplementary/12882_2013_725_MOESM22_ESM.pdf/9454558)

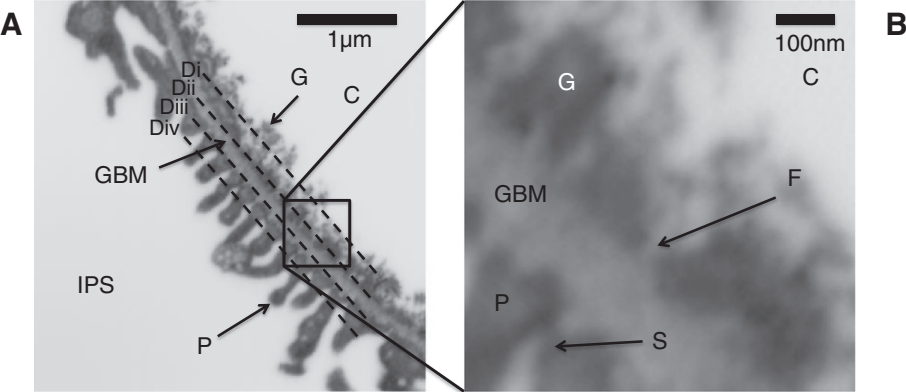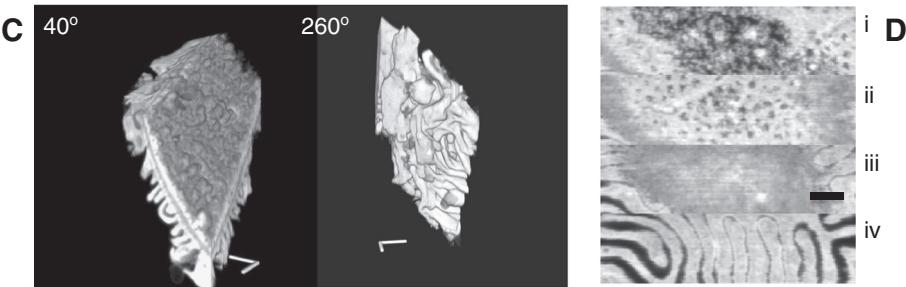

Supplement: MOESM22 [file 9454558]
